# Supplementary material
Source: PubMed Central journal article supplement (PMC2346521)
Supplement: rstb20061999s03.pdf [file rstb20061999s03.pdf]

**Table 1:** Byrne and Whiten's (1990) functional taxonomy of tactical deception adapted for human infants and toddlers

| Byrne and Whiten (1990) Categories and Sub-categories                                                             | Categories for human infants and toddlers                                                                                        | Ages and examples from human infants and toddlers (from Reddy, 1991, 1998; Dunn, 1988; Newton, Reddy & Bull, 2000 and personal observations)                                                                                                                                     |
|-------------------------------------------------------------------------------------------------------------------|----------------------------------------------------------------------------------------------------------------------------------|----------------------------------------------------------------------------------------------------------------------------------------------------------------------------------------------------------------------------------------------------------------------------------|
| <b>CONCEALMENT</b> (of something from another)                                                                    |                                                                                                                                  |                                                                                                                                                                                                                                                                                  |
| By silence                                                                                                        |                                                                                                                                  | doing forbidden things quietly – no clear data                                                                                                                                                                                                                                   |
| <b>By hiding</b>                                                                                                  | <b>Passive Hiding</b> from other's view: Waiting until moment parent leaves room to engage in forbidden activity.                | <b>8 / 9 m.</b> Waiting until other leaves room before rushing to forbidden activity. Eating cheese plant., pulling curtains, etc. (R, 1991, 1998)                                                                                                                               |
|                                                                                                                   | <b>Active Hiding</b> from other's view: Turning the back or using body to screen forbidden activity or object from other's view. | <b>16 m</b> Turning back so that body screens forbidden object or activity from view (Pers. Obs)<br><b>18 m</b> Going behind the settee to engage in forbidden activity (pulling at stitches) (D, 1988)                                                                          |
|                                                                                                                   | <b>Verbal Denial</b> of misdemeanour or forbidden activity or object.                                                            | <b>2+ years.</b> 'What have you got behind your back?' 'Nothing', several examples (N, R & B, 2000)                                                                                                                                                                              |
| By inhibiting interest in object                                                                                  |                                                                                                                                  |                                                                                                                                                                                                                                                                                  |
| <b>By ignoring</b>                                                                                                | <b>Ignoring other's calls</b> with stiffened and still body                                                                      | <b>9 m/ 11m</b> 'Pretending not to hear' 'pretending to be deaf' when called (either because they are engrossed in a toy, or because doing something forbidden) but holding the body so still and not even turning to the sound, that it looks clearly motivated (R, 1991, 1998) |
| <b>By hiding an object</b>                                                                                        |                                                                                                                                  | <b>11 m.</b> Unexpectedly hiding the ball under own legs in a game when expected to roll it back, looking at mother and laughing. Not a prior game (R, 1998)                                                                                                                     |
| <b>DISTRACTION</b> (of the other's attention away from a certain spatial locus thus attaining goal at that locus) |                                                                                                                                  |                                                                                                                                                                                                                                                                                  |
| <b>By Calling</b>                                                                                                 |                                                                                                                                  | <b>17.5 m.</b> Calling M to look at dog in order to repeat playful throwing of gloves (Sully, 1896, in D, 1988)                                                                                                                                                                  |
| By Looking                                                                                                        |                                                                                                                                  |                                                                                                                                                                                                                                                                                  |
| By Threat                                                                                                         |                                                                                                                                  |                                                                                                                                                                                                                                                                                  |
| By Leading                                                                                                        |                                                                                                                                  |                                                                                                                                                                                                                                                                                  |
| <b>By Close-range behaviour</b>                                                                                   | <b>Holding the other's eyes</b> while engaging in forbidden activity.                                                            | <b>11 m/ 13 m</b> Staring the other out, while performing the forbidden act in surreptitious manner, two examples (R, 1998)                                                                                                                                                      |
| By acquired signing                                                                                               |                                                                                                                                  |                                                                                                                                                                                                                                                                                  |
| <b>ATTRACTION</b> (of the other to a certain spatial locus and thus attaining goal at that locus)                 |                                                                                                                                  |                                                                                                                                                                                                                                                                                  |
| <b>By Calling</b>                                                                                                 | <b>Fake Crying</b> (the spatial locus is the self)                                                                               | <b>8 m/ 9 m</b> Using cries to 'call' the other, with the cries themselves identifiable as 'fake' with non-distressed 'waiting for response', several reports (R, 1991, R, 1998)                                                                                                 |
| By Looking                                                                                                        |                                                                                                                                  |                                                                                                                                                                                                                                                                                  |
| By Leading                                                                                                        |                                                                                                                                  |                                                                                                                                                                                                                                                                                  |

|                                                                                                                                     |                                                                                                                     |                                                                                                                                                                                                                                                                                                                                                                                                                                      |
|-------------------------------------------------------------------------------------------------------------------------------------|---------------------------------------------------------------------------------------------------------------------|--------------------------------------------------------------------------------------------------------------------------------------------------------------------------------------------------------------------------------------------------------------------------------------------------------------------------------------------------------------------------------------------------------------------------------------|
| <b>By Close-range behaviour</b>                                                                                                     | <b>Fake Laughing</b> (the spatial locus is the self)                                                                | <b>6 m / 7 m +</b> Laughing in an 'artificial' manner when overhear other laughing, in 'order to join in' with them, be part of a group, several reports (R, 1991, R, 1998, pers. obs)                                                                                                                                                                                                                                               |
| <b>CREATING AN IMAGE</b><br>(which conceals the agent's intentions and facilitates attainment of goal. It may be):                  |                                                                                                                     |                                                                                                                                                                                                                                                                                                                                                                                                                                      |
| <b>Neutral</b> (to appear of little or no significance to other; e.g., suppressing aggression or 'smiles')                          | <b>Feigning innocence/ ignorance</b>                                                                                | <b>11m</b> When caught approaching forbidden soil in house plant, waving / scooping hand up, as if pretending not really going to touch it; repeated several times, single report (R, 1998)<br><b>30 m.</b> 'What's happened to this? I don't know'. 'I don't know who messed it (the tidy room) up' several reports (N, R & B, 2000)<br><b>33 m.</b> pretending to clean paint off the TV (to be allowed to remain there) (D, 1988) |
|                                                                                                                                     | Suppression of Expression                                                                                           | <b>18 m</b> Suppression of smile in embarrassment at being seen unexpectedly by large audience or being asked to perform in front of audience (pers. obs)                                                                                                                                                                                                                                                                            |
| <b>Affiliative</b> (to appear to increase affiliation with other; e.g., offer of grooming or of hand before rapid change of action) | <b>Feigning offer (Playful)</b> of object or of self before withdrawing rapidly                                     | <b>9 m +</b> After evidence of successful offer and release skill, offering and rapid withdrawing of object, several examples around this age and later (R, 1991, 1998)<br><b>11 m</b> On request to 'come to me' putting hands out to go, then backing off and laughing – a regular game, not shy, and not with new people only, also with M, F, Gm, 'just pretending' single example at this age (R, 1998)                         |
|                                                                                                                                     | <b>Feigning request (Playful)</b> of object, only to refuse it on receipt, then repeating immediately               | <b>11 m</b> Requesting the juice while M doing something else, then refusing it when given, and repeated a few times until M noticed and saw he was looking at her with half smile, single example (R, 1998)                                                                                                                                                                                                                         |
|                                                                                                                                     | <b>Pretend injury</b> (seeking sympathy for self or privilege)                                                      | <b>18 m / 24 m</b> Claiming foot injury "hurt, hurt" following elder sib's injury. (pers. obs); 'I've got a bellyache'<br><b>21 m.</b> "Cack" (lying down and gesturing, seeking bath, D, 1988<br><b>11m, 33 m.</b> Pretend cry when told off (R, 1998, D, 1988)                                                                                                                                                                     |
| <b>Threatening</b> (to appear to show a threat to the other)                                                                        | <b>Feigning misdemeanour/ non-compliance (Playful/ Attention seeking)</b>                                           | <b>9 m</b> Pretending going to touch something, not actually wanting to touch it, flicking finger on hot tea cup, etc. Several examples. (R, 1998);<br><b>11 m</b> Pretending to take bite out of cardboard box ; pretending to bash TV ; 'almost touching' plant in friend's house (R, 1998); pretending to touch cooker (pers. obs);<br><b>3 yrs</b> 'I'm going to write on the floor....only joking' (N, R & B, 2000)             |
|                                                                                                                                     | <b>Feigning error (Playful)</b>                                                                                     | <b>11 m</b> Calling M 'Daddy' (R, 1998)<br><b>2.5 yrs</b> 'I dun wee wee here on the wall' ( 'It's (the bedroom) there, it's there!' (pointing to the bathroom and grinning); pointing to all the wrong drawers, asking where the pyjamas are, deliberately pretending not to know where they are, and avoiding the one M was verbally indicating. N, R & B, 2000)                                                                   |
| <b>Self competence</b>                                                                                                              | <b>'Didn't hurt' bravado.</b> Denial of pain following smacking for misdemeanour or injury upon doing forbidden act | <b>2.5 yrs.</b> "That didn't real hurt!", several examples (N, R & B, 2000)                                                                                                                                                                                                                                                                                                                                                          |

|                                                                                                                                                       |                                                                                                                                    |                                                                                                                                                                                                                                       |
|-------------------------------------------------------------------------------------------------------------------------------------------------------|------------------------------------------------------------------------------------------------------------------------------------|---------------------------------------------------------------------------------------------------------------------------------------------------------------------------------------------------------------------------------------|
|                                                                                                                                                       | <b>'Don't care' bravado.</b> Denial of desire for (desired but denied) object. Denial of fear for threatened (frightening) object. | <b>2.5 yrs.</b> 'I didn't want it anyway'; 'I don't care, I been playing with it all day' (N, R & B, 2000)                                                                                                                            |
|                                                                                                                                                       | <b>False boasts.</b> Claiming possession of object or skill which isn't true.                                                      | <b>3 yrs.</b> 'I got one of them too', several examples (N, R & B, 2000)                                                                                                                                                              |
|                                                                                                                                                       | <b>Denial of error</b> by pretending original action was different, by trying to alter current reality                             | <b>2.5 yrs.</b> 'My other Daddy's upstairs'; 'I said we'll pick her up <i>later</i> that's what I said'; 'And I've got to put the bowl on the table <i>quietly</i> '; 'That were me making the noise (not the bowl)' (N, R & B, 2000) |
| <b>DEFLECTION</b> (diverting a threat onto an innocent third-party. May include distraction but goes further to divert an attack, not just attention) | <b>False blame</b>                                                                                                                 | <b>2.5 yrs.</b> 'Someone else, not me'. 'Carol did it' several examples (N, R & B, 2000, D, 1988)<br><b>3 yrs.</b> False accusation of 3 <sup>rd</sup> person to justify self fantasy (D, 1988)                                       |
| <b>USING A SOCIAL TOOL</b> (manipulating a third-party in order to deliberately influence the other)                                                  |                                                                                                                                    |                                                                                                                                                                                                                                       |
| Tool deceived                                                                                                                                         |                                                                                                                                    |                                                                                                                                                                                                                                       |
| <b>Target deceived</b>                                                                                                                                | <b>False promise</b> about future act with an object (a physical rather than social tool)                                          | <b>2.5 yrs.</b> 'No .. I won't do it again (if you give it to me)' (N, R & B, 2000)                                                                                                                                                   |
| <b>Tool and target deceived</b>                                                                                                                       | <b>False permission-assertion</b> (by another authority figure)                                                                    | <b>2.5 yrs.</b> 'Daddy said I could' 'Dad said yes, but ask you as well'.; 'Mum lets me walk here' several examples (N, R & B, 2000)                                                                                                  |
| <b>COUNTERDECEPTION</b> (reducing the success of the other's tactical deception; may or may not involve countering deception with deception)          | <b>'Before she tricks me, I'm going to trick her'</b>                                                                              |                                                                                                                                                                                                                                       |

**Table 2.** Parallels and Continuities in True and False Informing, Expressing and Gesturing

| AGE IN MONTHS | ‘True’ informing, ‘true’ expressing and ‘true’ intentional gestures                                                                                                                                                                                                                                              | ‘False’ informing, ‘false’ expressing and ‘false’ intentional gestures<br><i>Concealment or inhibition of ‘information’</i>    |
|---------------|------------------------------------------------------------------------------------------------------------------------------------------------------------------------------------------------------------------------------------------------------------------------------------------------------------------|--------------------------------------------------------------------------------------------------------------------------------|
| 9 -10         | Shaking head to refuse (Bates et al, 1976)<br>Offering objects and giving                                                                                                                                                                                                                                        | ‘Fake’ expressions, gestures, passive hiding of actions                                                                        |
| 11-12         | Informative Pointing (Liszkowski et al, 2005)<br>Giving novel object to surprised adult (Tomasello & Haberl, 2003)                                                                                                                                                                                               | Mis-naming, pretend misdemeanour (intentions) ‘holding the eyes’ to obscure actions, suppressing response                      |
| 14            | Correcting communicative misunderstanding (Golinkoff, 1983, 1986)                                                                                                                                                                                                                                                |                                                                                                                                |
| 16-20         | Distinguishing true and false statements (Pea, 1982; Hummer, Wimmer & Antes, 1993)<br>Rejecting false informants (Baldwin & Moses, 2001)<br>Selective informing about object existence and object features to ignorant others (Reddy & Simone, 1995)<br>Correct verbal contradictions about reality (Dunn, 1988) | Feigning injury, feigning dirty nappy, Active hiding (turning body, going behind screen), Smile suppression in (embarrassment) |
| 30            | Selection of information about object location to ignorant others (O’Neill, 1996)                                                                                                                                                                                                                                | False blame, False permission , False promise, Ego-defensive false information, False information about reality                |
| 36            | Spontaneous information when other has a false belief (Teerwogt, Rieffe, Tuijn, Harris & Mant, 1999)                                                                                                                                                                                                             |                                                                                                                                |
